# Supplementary material
Source: publisher site journal article supplement (http://www.kjim.org/upload/media/kjim-2019-446-suppl2.pdf)
Supplement: Supplementary file 1 [file kjim-2019-446-suppl2.pdf]

**Supplementary Table 2. Baseline characteristics and clinical features of survivor and non-survivor group in the high APACHE-II score group ( $\geq 27.5$ )**

| Characteristic                     | Survivor (n = 16)     | Non-survivor (n = 78) | p value |
|------------------------------------|-----------------------|-----------------------|---------|
| Serum NGAL, ng/mL                  | 797.5 (548.8–1,370.5) | 759.5 (394.5–1,446.0) | 0.864   |
| APACHE-II score                    | 30.0 (28.0–35.0)      | 33.0 (30.8–37.0)      | 0.040   |
| SOFA score                         | 14.0 (12.3–15.8)      | 15.0 (13.0–17.0)      | 0.137   |
| Serum NGAL $\geq 805.0$ ng/mL      | 7 (43.8)              | 38 (48.7)             | 0.717   |
| APACHE-II score $\geq 32.5$        | 5 (31.3)              | 45 (57.7)             | 0.053   |
| SOFA score $\geq 14.5$             | 7 (43.8)              | 45 (57.7)             | 0.307   |
| Age, yr                            | 64.7 $\pm$ 12.4       | 65.5 $\pm$ 14.9       | 0.839   |
| Body mass index, kg/m <sup>2</sup> | 24.1 (20.9–27.9)      | 22.7 (20.7–24.9)      | 0.337   |
| Male sex                           | 7 (43.8)              | 46 (59.0)             | 0.263   |
| C-reactive protein, mg/dL          | 13.3 (5.1–20.8)       | 11.1 (3.7–19.9)       | 0.782   |
| Mechanical ventilation             | 10 (62.5)             | 70 (89.7)             | 0.013   |
| Inotropics administration          | 14 (87.5)             | 68 (87.2)             | 1.000   |
| Indication for CRRT initiation     |                       |                       |         |
| Sepsis                             | 9 (56.3)              | 49 (62.8)             | 0.622   |
| Postoperation                      | 1 (6.3)               | 5 (6.4)               | 1.000   |
| Cardiac                            | 1 (6.3)               | 8 (10.3)              | 1.000   |
| Pulmonary                          | 1 (6.3)               | 1 (1.3)               | 0.313   |
| Hepatic                            | 2 (12.5)              | 7 (9.0)               | 0.647   |
| Renal                              | 2 (12.5)              | 3 (3.8)               | 0.200   |
| Malignancy                         | 0                     | 3 (3.8)               | 1.000   |
| Others                             | 0                     | 2 (2.6)               | 1.000   |
| Comorbidities                      |                       |                       |         |
| Diabetes mellitus                  | 4 (25.0)              | 19 (24.4)             | 1.000   |
| Hypertension                       | 7 (43.8)              | 35 (44.9)             | 0.934   |
| Chronic kidney disease             | 3 (18.8)              | 6 (7.7)               | 0.178   |
| Cerebro-cardiovascular disease     | 5 (31.3)              | 18 (23.1)             | 0.529   |
| Pulmonary disease                  | 1 (6.3)               | 8 (10.3)              | 1.000   |
| Liver disease                      | 4 (25.0)              | 13 (16.7)             | 0.479   |
| Dementia                           | 0                     | 1 (1.3)               | 1.000   |
| Malignancy                         | 6 (37.5)              | 17 (21.8)             | 0.208   |

Values are presented as median (interquartile range), number (%), or mean  $\pm$  SD.

APACHE-II, Acute Physiology and Chronic Health Evaluation-II; NGAL, neutrophil gelatinase-associated lipocalin; SOFA, Sequential Organ Failure Assessment; CRRT, continuous renal replacement therapy.
